# Supplementary material for: DUSP4 protects BRAF- and NRAS-mutant melanoma from oncogene overdose through modulation of MITF
Source: PubMed Central journal article supplement (PMC9113946; doi:10.26508/lsa.202101235), 2022-05-17

SOURCE DATA

**Figure 4A**

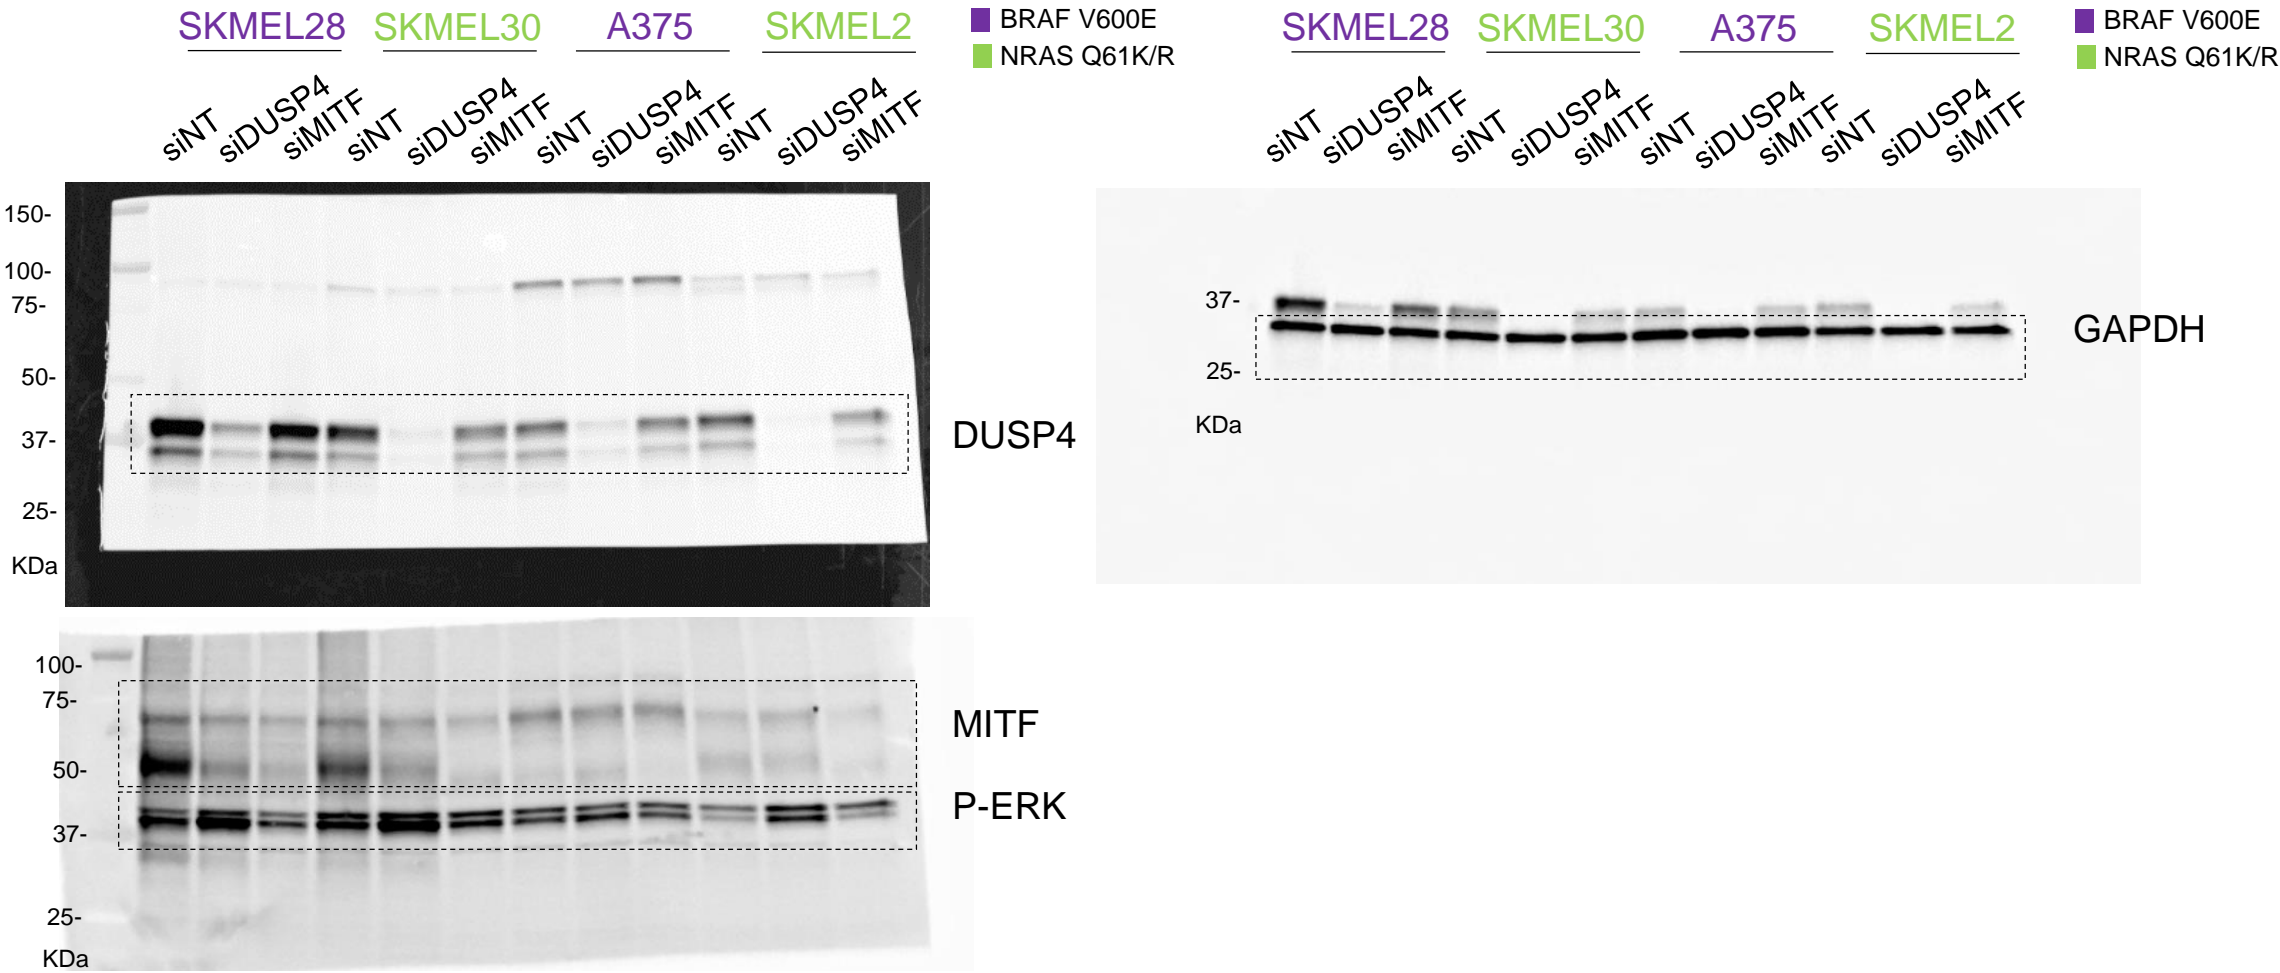

SOURCE DATA

**Supplementary Figure 5A**

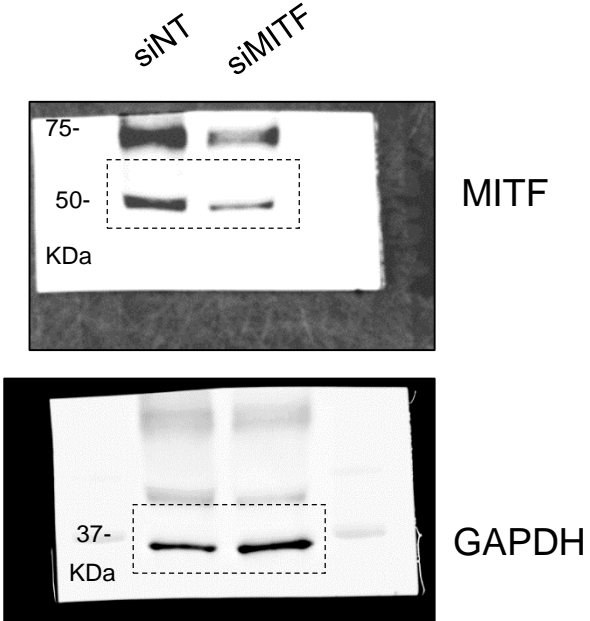

Supplement: LSA-2021-01235_SdataF4_FS5.pdf [file LSA-2021-01235_SdataF4_FS5.pdf]
